# Supplementary material for: Elucidating organ-specific metabolic toxicity chemistry from electrochemiluminescent enzyme/DNA arrays and bioreactor bead-LC-MS/MS
Source: PubMed Central journal article supplement — Chem Sci. 2015 Feb 19;6(4):2457–68. doi: 10.1039/c4sc03401e (PMC4364445; doi:10.1039/c4sc03401e), 2015-02-19
Supplement: NIHMS666756-supplement-Table_of_Contents.pdf [file NIHMS666756-supplement-Table_of_Contents.pdf]

## TOC

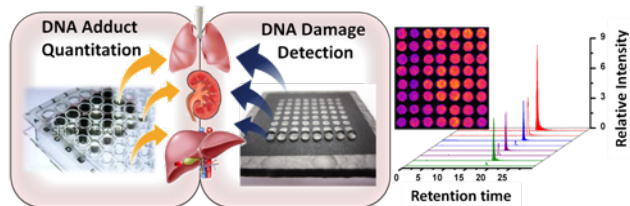

Combining electrochemiluminescent array and bioreactor bead-LC-MS/MS featuring metabolic enzyme-DNA films provide an efficient, comprehensive approach to simultaneously elucidate metabolic DNA damage chemistries at different human organs for potential new drugs and environmental chemicals.
